# Supplementary material for: Predicting protein residue-residue contacts using random forests and deep networks
Source: BMC Bioinformatics. 2019 Mar 14;20(Suppl 2):100. doi: 10.1186/s12859-019-2627-6 (PMC6419322; doi:10.1186/s12859-019-2627-6)
Supplement: Supplementary file 2 — Supplementary Data (model name and evaluation criteria). This file includes the training evaluation results for our svm_sep6_balanced model. Specifically, it shows the performance of each candidate model on the training dataset. A more detailed description of this data and the hyperparameters associated with each model can be found in the supplementary information (see Additional file 1). (XLSX 15 kb) [file 12859_2019_2627_MOESM2_ESM.xlsx]

## Sheet: Sheet1
model name and evaluation criteria:	evaluation criteria	score
0model_0	acc6:	0.679679
0model_0	cov6:	0.723331
0model_10	acc6:	0.6807
0model_10	cov6:	0.726198
0model_11	acc6:	0.47991
0model_11	cov6:	0.419906
0model_12	acc6:	0.63758
0model_12	cov6:	0.596791
0model_13	acc6:	0.672575
0model_13	cov6:	0.587839
0model_14	acc6:	0.662944
0model_14	cov6:	0.614998
0model_15	acc6:	0.401045
0model_15	cov6:	0.490117
0model_16	acc6:	0.654002
0model_16	cov6:	0.67525
0model_17	acc6:	0.635814
0model_17	cov6:	0.550018
0model_18	acc6:	0.652686
0model_18	cov6:	0.666046
0model_19	acc6:	0.360682
0model_19	cov6:	0.370115
0model_1	acc6:	0.680619
0model_1	cov6:	0.725394
0model_20	acc6:	0.675972
0model_20	cov6:	0.729518
0model_21	acc6:	0.378399
0model_21	cov6:	0.396821
0model_22	acc6:	0.654755
0model_22	cov6:	0.568576
0model_23	acc6:	0.373687
0model_23	cov6:	0.393703
0model_24	acc6:	0.438993
0model_24	cov6:	0.532364
0model_2	acc6:	0.680681
0model_2	cov6:	0.725494
0model_3	acc6:	0.679611
0model_3	cov6:	0.723533
0model_4	acc6:	0.676653
0model_4	cov6:	0.720213
0model_5	acc6:	0.667344
0model_5	cov6:	0.710406
0model_6	acc6:	0.654831
0model_6	cov6:	0.702158
0model_7	acc6:	0.6484
0model_7	cov6:	0.68375
0model_8	acc6:	0.636769
0model_8	cov6:	0.725544
0model_9	cov6:	0
1model_0	acc6:	0.646842
1model_0	cov6:	0.62742
1model_10	acc6:	0.647608
1model_10	cov6:	0.628326
1model_11	acc6:	0.646605
1model_11	cov6:	0.632198
1model_12	acc6:	0.52953
1model_12	cov6:	0.345421
1model_13	acc6:	0.404279
1model_13	cov6:	0.444802
1model_14	acc6:	0.584395
1model_14	cov6:	0.548861
1model_15	acc6:	0.445158
1model_15	cov6:	0.494996
1model_16	acc6:	0.5989
1model_16	cov6:	0.520495
1model_17	acc6:	0.595339
1model_17	cov6:	0.525424
1model_18	acc6:	0.592514
1model_18	cov6:	0.549364
1model_19	acc6:	0.445761
1model_19	cov6:	0.486295
1model_1	acc6:	0.647746
1model_1	cov6:	0.627873
1model_20	acc6:	0.647215
1model_20	cov6:	0.638133
1model_21	acc6:	0.616717
1model_21	cov6:	0.557008
1model_22	acc6:	0.400853
1model_22	cov6:	0.359201
1model_23	acc6:	0.397538
1model_23	cov6:	0.367047
1model_24	acc6:	0.620761
1model_24	cov6:	0.513705
1model_2	acc6:	0.64773
1model_2	cov6:	0.627923
1model_3	acc6:	0.646842
1model_3	cov6:	0.62742
1model_4	acc6:	0.643046
1model_4	cov6:	0.624352
1model_5	acc6:	0.632854
1model_5	cov6:	0.620027
1model_6	acc6:	0.619754
1model_6	cov6:	0.617915
1model_7	acc6:	0.613258
1model_7	cov6:	0.609063
1model_8	cov6:	0
1model_9	cov6:	0
2model_0	acc6:	0.625328
2model_0	cov6:	0.599507
2model_10	acc6:	0.626431
2model_10	cov6:	0.597194
2model_11	acc6:	0.624499
2model_11	cov6:	0.619474
2model_12	acc6:	0.595938
2model_12	cov6:	0.54016
2model_13	acc6:	0.452525
2model_13	cov6:	0.629935
2model_14	acc6:	0.423399
2model_14	cov6:	0.398783
2model_15	acc6:	0.41827
2model_15	cov6:	0.40346
2model_16	acc6:	0.609805
2model_16	cov6:	0.409747
2model_17	acc6:	0.403099
2model_17	cov6:	0.33496
2model_18	acc6:	0.608104
2model_18	cov6:	0.404567
2model_19	acc6:	0.575724
2model_19	cov6:	0.31107
2model_1	acc6:	0.626364
2model_1	cov6:	0.600563
2model_20	acc6:	0.625908
2model_20	cov6:	0.602173
2model_21	acc6:	0.623647
2model_21	cov6:	0.602726
2model_22	acc6:	0.607027
2model_22	cov6:	0.490922
2model_23	acc6:	0.447016
2model_23	cov6:	0.574109
2model_24	acc6:	0.426409
2model_24	cov6:	0.484635
2model_2	acc6:	0.626253
2model_2	cov6:	0.600362
2model_3	acc6:	0.625335
2model_3	cov6:	0.599356
2model_4	acc6:	0.620988
2model_4	cov6:	0.596439
2model_5	acc6:	0.610862
2model_5	cov6:	0.588342
2model_6	acc6:	0.599979
2model_6	cov6:	0.588694
2model_7	acc6:	0.596752
2model_7	cov6:	0.582105
2model_8	acc6:	0.589052
2model_8	cov6:	0.616959
2model_9	cov6:	0
3model_0	acc6:	0.617562
3model_0	cov6:	0.568425
3model_10	acc6:	0.618502
3model_10	cov6:	0.569632
3model_11	acc6:	0.617626
3model_11	cov6:	0.571342
3model_12	acc6:	0.428287
3model_12	cov6:	0.454006
3model_13	acc6:	0.59733
3model_13	cov6:	0.49741
3model_14	acc6:	0.590233
3model_14	cov6:	0.522758
3model_15	acc6:	0.597299
3model_15	cov6:	0.478248
3model_16	acc6:	0.598455
3model_16	cov6:	0.490972
3model_17	acc6:	0.595444
3model_17	cov6:	0.511442
3model_18	acc6:	0.596635
3model_18	cov6:	0.510034
3model_19	acc6:	0.593558
3model_19	cov6:	0.514359
3model_1	acc6:	0.6183
3model_1	cov6:	0.568576
3model_20	acc6:	0.428623
3model_20	cov6:	0.478399
3model_21	acc6:	0.592904
3model_21	cov6:	0.521098
3model_22	acc6:	0.44393
3model_22	cov6:	0.511492
3model_23	acc6:	0.451539
3model_23	cov6:	0.591158
3model_24	acc6:	0.440666
3model_24	cov6:	0.518081
3model_2	acc6:	0.618261
3model_2	cov6:	0.568727
3model_3	acc6:	0.617356
3model_3	cov6:	0.568174
3model_4	acc6:	0.613862
3model_4	cov6:	0.567922
3model_5	acc6:	0.605115
3model_5	cov6:	0.567621
3model_6	acc6:	0.592424
3model_6	cov6:	0.569481
3model_7	acc6:	0.587367
3model_7	cov6:	0.566363
3model_8	acc6:	0.585002
3model_8	cov6:	0.573203
3model_9	acc6:	0.582619
3model_9	cov6:	0.598501
4model_0	acc6:	0.630043
4model_0	cov6:	0.575668
4model_10	acc6:	0.631306
4model_10	cov6:	0.575869
4model_11	acc6:	0.63006
4model_11	cov6:	0.577679
4model_12	acc6:	0.41518
4model_12	cov6:	0.454207
4model_13	acc6:	0.607512
4model_13	cov6:	0.514963
4model_14	acc6:	0.605622
4model_14	cov6:	0.536388
4model_15	acc6:	0.606066
4model_15	cov6:	0.538701
4model_16	acc6:	0.603124
4model_16	cov6:	0.545642
4model_17	acc6:	0.605349
4model_17	cov6:	0.533923
4model_18	acc6:	0.416281
4model_18	cov6:	0.457275
4model_19	acc6:	0.613181
4model_19	cov6:	0.505859
4model_1	acc6:	0.631048
4model_1	cov6:	0.575919
4model_20	acc6:	0.630457
4model_20	cov6:	0.580295
4model_21	acc6:	0.420332
4model_21	cov6:	0.439823
4model_22	acc6:	0.424158
4model_22	cov6:	0.488156
4model_23	acc6:	0.604111
4model_23	cov6:	0.530705
4model_24	acc6:	0.44454
4model_24	cov6:	0.54705
4model_2	acc6:	0.631274
4model_2	cov6:	0.575617
4model_3	acc6:	0.629897
4model_3	cov6:	0.575819
4model_4	acc6:	0.626816
4model_4	cov6:	0.575114
4model_5	acc6:	0.614913
4model_5	cov6:	0.574863
4model_6	acc6:	0.604473
4model_6	cov6:	0.579088
4model_7	acc6:	0.601235
4model_7	cov6:	0.577679
4model_8	cov6:	0
4model_9	cov6:	0
